# Supplementary material for: Slow magnetization dynamics in a series of two-coordinate iron(ii) complexes
Source: Royal Society of Chemistry journal article supplement (doi:10.1039/c2sc20801f), 2012-10-25
Supplement: c2sc20801f.pdf [file c2sc20801f.pdf]

Supporting Information for:

## Slow Magnetization Dynamics in a Series of Two-Coordinate Iron(II) Complexes

Joseph M. Zadrozny,<sup>a</sup> Mihail Atanasov,<sup>\*b,c,d</sup> Aimee M. Bryan,<sup>e</sup> Chun-Yi Lin,<sup>e</sup> Brian D. Recken,<sup>e</sup> Philip P. Power,<sup>\*e</sup> Frank Neese,<sup>\*d</sup> and Jeffrey R. Long<sup>\*a</sup>

<sup>a</sup>Department of Chemistry, University of California, Berkeley, California 94720, USA. Email: jrlong@berkeley.edu

<sup>b</sup>Max-Planck Institute for Bioinorganic Chemistry, Stifstr. 32-34, D-45470 Mülheim an der Ruhr, Germany

<sup>c</sup>Institute of General and Inorganic Chemistry, Bulgarian Academy of Sciences, Acad. Georgi Bontchev Str. 11, 113 Sofia, Bulgaria

<sup>d</sup>Département de Chimie, Université de Fribourg, Ch. du Musée, 9, CH-1700 Fribourg, Switzerland, 5

<sup>e</sup>Department of Chemistry, University of California, Davis, California, 95616, USA

*Chem. Sci.*

## Table of Contents

|                                                                                                                |     |
|----------------------------------------------------------------------------------------------------------------|-----|
| Details regarding determination of Superimposability Index, $R_o$ .                                            | S4  |
| <b>Table S1.</b> Full Crystallographic Table for <b>1</b> .                                                    | S5  |
| <b>Table S2.</b> Full Crystallographic Table for <b>3</b> .                                                    | S6  |
| <b>Figure S1:</b> Thermal ellipsoids of L-Fe-L moieties for <b>1-6</b> .                                       | S7  |
| <b>Figure S2:</b> Variable-temperature, variable-field magnetization data of <b>1</b> .                        | S8  |
| <b>Figure S3:</b> Variable-temperature, variable-field magnetization data of <b>2</b> .                        | S9  |
| <b>Figure S4:</b> Variable-temperature, variable-field magnetization data of <b>3</b> .                        | S10 |
| <b>Figure S5:</b> Variable-temperature, variable-field magnetization data of <b>4</b> .                        | S11 |
| <b>Figure S6:</b> Variable-temperature, variable-field magnetization data of <b>5</b> .                        | S12 |
| <b>Figure S7:</b> Variable-temperature, variable-field magnetization data of <b>6</b> .                        | S13 |
| <b>Figure S8:</b> Cole-cole plots used for the determination of the field dependence of $\tau$ for <b>1</b> .  | S14 |
| <b>Figure S9:</b> Cole-cole plots used for the determination of the field dependence of $\tau$ for <b>2</b> .  | S15 |
| <b>Figure S10:</b> Cole-cole plots used for the determination of the field dependence of $\tau$ for <b>3</b> . | S16 |
| <b>Figure S11:</b> Cole-cole plots used for the determination of the field dependence of $\tau$ for <b>4</b> . | S17 |
| <b>Figure S12:</b> Cole-cole plots used for the determination of the field dependence                          |     |



|                                                                                                                       |     |
|-----------------------------------------------------------------------------------------------------------------------|-----|
| of $\tau$ for <b>5</b> .                                                                                              | S18 |
| <b>Figure S13:</b> Frequency dependence of $\chi_M''$ for <b>6</b> under various applied dc fields.                   | S19 |
| <b>Figure S14:</b> Field dependences of $\tau$ for <b>1-5</b> with fits.                                              | S20 |
| <b>Figure S15:</b> Frequency dependence of $\chi_M''$ for <b>2</b> at temperatures from 2 to 17 K                     | S21 |
| <b>Figure S16:</b> Frequency dependence of $\chi_M''$ for <b>3</b> at temperatures from 2 to 12 K                     | S22 |
| <b>Figure S17:</b> Frequency dependence of $\chi_M''$ for <b>4</b> at temperatures from 2 to 14 K                     | S23 |
| <b>Figure S18:</b> Frequency dependence of $\chi_M''$ for <b>5</b> at temperatures from 2 to 8 K                      | S24 |
| <b>Figure S19:</b> Frequency dependence of $\chi_M''$ and $\chi_M'$ for <b>6</b> at temperatures from<br>1.8 to 3.7 K | S25 |
| <b>Figure S20:</b> Cole-cole plots used for the determination of the $T$ -dependence<br>of $\tau$ for <b>1</b> .      | S26 |
| <b>Figure S21:</b> Cole-cole plots used for the determination of the $T$ -dependence<br>of $\tau$ for <b>2</b> .      | S27 |
| <b>Figure S22:</b> Cole-cole plots used for the determination of the $T$ -dependence<br>of $\tau$ for <b>3</b> .      | S28 |
| <b>Figure S23:</b> Cole-cole plots used for the determination of the $T$ -dependence<br>of $\tau$ for <b>4</b> .      | S29 |
| <b>Figure S24:</b> Cole-cole plots used for the determination of the $T$ -dependence<br>of $\tau$ for <b>5</b> .      | S30 |

### Derivation of the superimposability index, $R_\sigma$ .

Originally, we had planned to evaluate this index based on deviations from the Brillouin function. We tried, using  $S = 1/2$  and variable  $g$  for each data set, but in all cases the Brillouin function did not adequately represent a master function with which we could compare superimposability. Instead we used eq (S1) as a fitting equation, which would be weighted to fit the three highest- $T$  data of the 1 T data set and the three lowest- $T$  data of the 7 T set. The values of  $c_1$ ,  $c_2$ ,  $c_3$ ,  $c_4$ , and the exponent  $n$ , determined from these fits, are given in Table 2.

$$M = \left( \frac{c_1 \left( \frac{H}{T} \right)^n}{c_2 \left( \frac{H}{T} \right)^n + c_3 \left( \frac{H}{T} \right)} \right) + c_4 \quad (\text{S1})$$

The experimental magnetizations were compared with these ideal, master functions, and the superimposability index,  $R_\sigma$ , was then defined according to eq (S2). The master functions for each complex are plotted as black lines in Figs. S1 – S6.

$$R_\sigma = \sum_i \frac{(M_{\text{exp},i} - M_{\text{calc},i})^2}{M_{\text{exp},i}} \quad (\text{S2})$$

Fitted coefficients and exponents for derivation of  $R_\sigma$ , the superimposability index.

| Complex  | $c_1$ | $c_2$ | $c_3$ | $c_4$ | $n$  | $R_\sigma$ |
|----------|-------|-------|-------|-------|------|------------|
| <b>1</b> | 1.492 | 0.748 | 0.081 | 1.08  | 3.34 | 0.029      |
| <b>2</b> | 1.487 | 0.658 | 0.075 | 1.01  | 3.13 | 0.027      |
| <b>3</b> | 2.048 | 1.018 | 0.112 | 0.75  | 3.08 | 0.013      |
| <b>4</b> | 4.969 | 3.428 | 0.494 | 0.73  | 3.16 | 0.062      |
| <b>5</b> | 6.094 | 3.734 | 0.395 | 0.44  | 2.93 | 0.005      |
| <b>6</b> | 5.788 | 4.354 | 0.865 | 0.62  | 3.38 | 0.135      |

**Table S1.** Crystallographic Data<sup>a</sup> for **1**.

|                                                                           |                                                                   |
|---------------------------------------------------------------------------|-------------------------------------------------------------------|
| Empirical formula                                                         | C <sub>50</sub> H <sub>52</sub> FeN <sub>2</sub> Si <sub>2</sub>  |
| Formula weight                                                            | 552.77                                                            |
| <i>T</i> , K                                                              | 95(1)                                                             |
| $\lambda$ , Å                                                             | 0.7107                                                            |
| Crystal system                                                            | Triclinic                                                         |
| Space group                                                               | <i>P</i> -1                                                       |
| Habit                                                                     | Block                                                             |
| Color                                                                     | Brown                                                             |
| <i>a</i> , Å                                                              | 8.8101(5)                                                         |
| <i>b</i> , Å                                                              | 9.1759(5)                                                         |
| <i>c</i> , Å                                                              | 11.1624(6)                                                        |
| $\alpha$ , °                                                              | 102.4670(10)                                                      |
| $\beta$ , °                                                               | 92.5030(10)                                                       |
| $\gamma$ , °                                                              | 113.9320(10)                                                      |
| <i>V</i> , Å <sup>3</sup>                                                 | 796.59(8)                                                         |
| <i>Z</i>                                                                  | 1                                                                 |
| $\rho_{\text{calc}}$ , g/cm <sup>3</sup>                                  | 1.152                                                             |
| $\mu$ , mm <sup>-1</sup>                                                  | 0.568                                                             |
| <i>F</i> <sub>000</sub>                                                   | 300                                                               |
| Crystal dimensions                                                        | 0.368 × 0.367 × 0.358 mm <sup>3</sup>                             |
| 2 $\theta$ range, °                                                       | 3.78 – 55.02                                                      |
| Index ranges                                                              | -10 ≤ <i>h</i> ≤ 11<br>-11 ≤ <i>k</i> ≤ 11<br>-14 ≤ <i>l</i> ≤ 14 |
| Reflections collected                                                     | 8827                                                              |
| Independent reflections                                                   | 3654 [ <i>R</i> <sub>int</sub> = 0.0140]                          |
| Completeness to 2 $\theta$ = 55.02                                        | 99.6 %                                                            |
| Data / restraints / parameters                                            | 3654 / 167 / 0                                                    |
| Goodness-of-fit on <i>F</i> <sup>2</sup>                                  | 1.002                                                             |
| Final <i>R</i> indices [ <i>I</i> > 2 $\sigma$ ( <i>I</i> )] <sup>b</sup> | <i>R</i> <sub>1</sub> = 0.0345, <i>wR</i> <sub>2</sub> = 0.1035   |
| <i>R</i> indices (all data)                                               | <i>R</i> <sub>1</sub> = 0.0376, <i>wR</i> <sub>2</sub> = 0.1065   |
| Largest diff. peak and hole                                               | 0.484 and -0.535 eÅ <sup>3</sup>                                  |

<sup>a</sup>Obtained with graphite-monochromated Mo K $\alpha$  ( $\lambda$  = 0.7107 Å) radiation. <sup>b</sup>*R*<sub>1</sub> =  $\Sigma||F_o||F_c||/|F_o|$ , *wR*<sub>2</sub> =  $\{\Sigma[w(F_o^2 - F_c^2)^2]/\Sigma[w(F_o^2)^2]\}^{1/2}$ .

**Table S2.** Crystallographic Data<sup>a</sup> for **3**.

|                                                                           |                                                                                |
|---------------------------------------------------------------------------|--------------------------------------------------------------------------------|
| Empirical formula                                                         | C <sub>60</sub> H <sub>76</sub> Fe <sub>0.93</sub> N <sub>2</sub> <sup>c</sup> |
| Formula weight                                                            | 877.17                                                                         |
| <i>T</i> , K                                                              | 90(2)                                                                          |
| $\lambda$ , Å                                                             | 0.7107                                                                         |
| Crystal system                                                            | Monoclinic                                                                     |
| Space group                                                               | <i>P</i> 2 <sub>1</sub> /n                                                     |
| Habit                                                                     | Block                                                                          |
| Color                                                                     | Red-orange                                                                     |
| <i>a</i> , Å                                                              | 10.8937(18)                                                                    |
| <i>b</i> , Å                                                              | 20.234(3)                                                                      |
| <i>c</i> , Å                                                              | 11.2231(19)                                                                    |
| $\alpha$ , °                                                              | 90                                                                             |
| $\beta$ , °                                                               | 90.829(3)                                                                      |
| $\gamma$ , °                                                              | 90                                                                             |
| <i>V</i> , Å <sup>3</sup>                                                 | 2473.5(7)                                                                      |
| <i>Z</i>                                                                  | 2                                                                              |
| $\rho_{\text{calc}}$ , g/cm <sup>3</sup>                                  | 1.178                                                                          |
| $\mu$ , mm <sup>-1</sup>                                                  | 0.325                                                                          |
| <i>F</i> <sub>000</sub>                                                   | 948                                                                            |
| Crystal dimensions                                                        | 0.25 × 0.17 × 0.14 mm <sup>3</sup>                                             |
| 2 $\theta$ range, °                                                       | 4.02 – 50.70                                                                   |
| Index ranges                                                              | -13 ≤ <i>h</i> ≤ 13<br>-24 ≤ <i>k</i> ≤ 24<br>-13 ≤ <i>l</i> ≤ 13              |
| Reflections collected                                                     | 27437                                                                          |
| Independent reflections                                                   | 4534 [ <i>R</i> <sub>int</sub> = 0.0416]                                       |
| Completeness to 2 $\theta$ = 50.70                                        | 100.0 %                                                                        |
| Data / restraints / parameters                                            | 4534 / 0 / 298                                                                 |
| Goodness-of-fit on <i>F</i> <sup>2</sup>                                  | 1.031                                                                          |
| Final <i>R</i> indices [ <i>I</i> > 2 $\sigma$ ( <i>I</i> )] <sup>b</sup> | <i>R</i> <sub>1</sub> = 0.0338, <i>wR</i> <sub>2</sub> = 0.0800                |
| <i>R</i> indices (all data)                                               | <i>R</i> <sub>1</sub> = 0.0449, <i>wR</i> <sub>2</sub> = 0.0857                |
| Largest diff. peak and hole                                               | 0.359 and -0.212 eÅ <sup>3</sup>                                               |

<sup>a</sup>Obtained with graphite-monochromated Mo K $\alpha$  ( $\lambda$  = 0.7107 Å) radiation. <sup>b</sup>*R*<sub>1</sub> =  $\Sigma||F_o||F_c||/|F_o|$ , *wR*<sub>2</sub> =  $\{\Sigma[w(F_o^2 - F_c^2)^2]/\Sigma[w(F_o^2)^2]\}^{1/2}$ . <sup>c</sup>Substitutional disorder between the complex and free ligand is observed, leading to a model with incomplete Fe-occupancy.

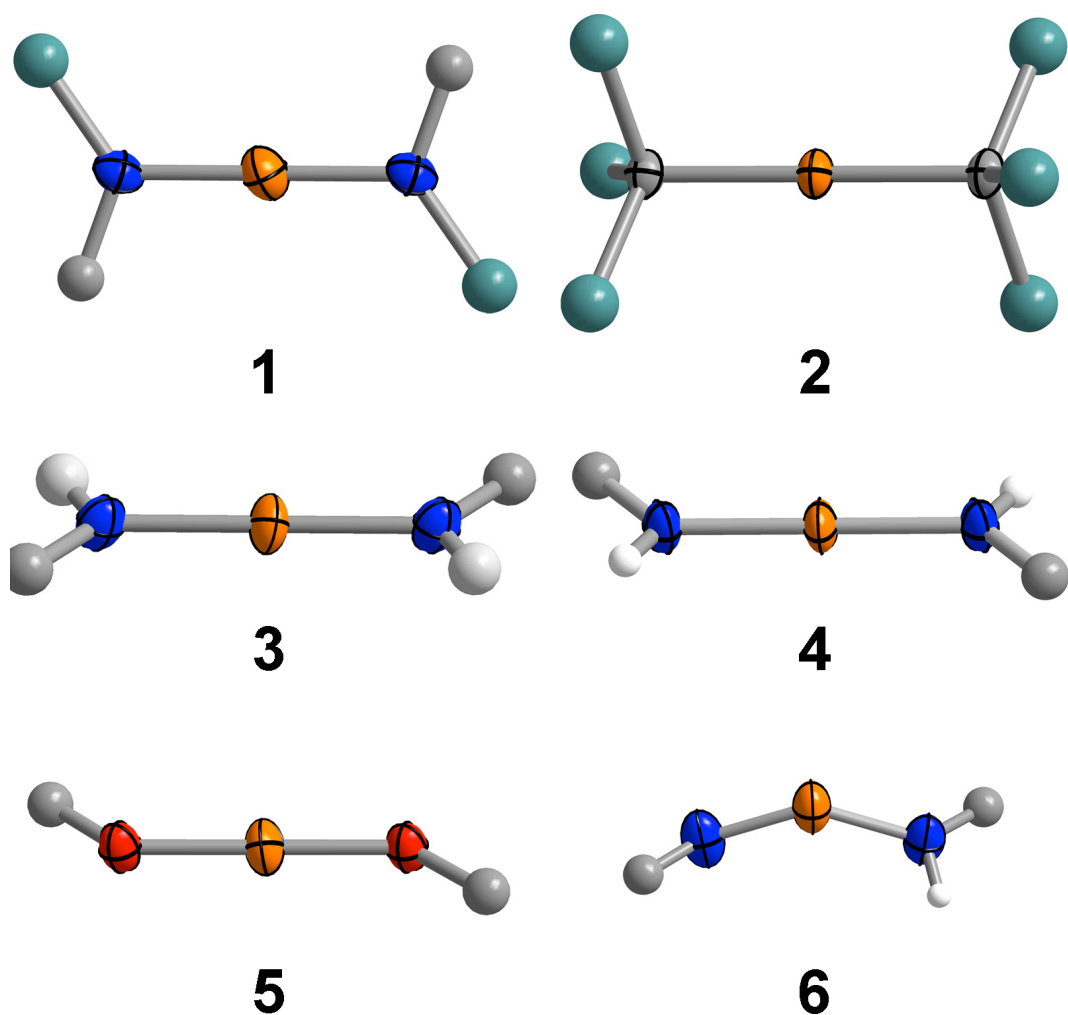

**Figure S1.** Probability ellipsoids of the L-Fe-L moieties for complexes **1-6**, depicted at the 80% level. Only the thermal parameters of the Fe ions and their immediate neighbors are depicted. Orange, blue, red, and gray ellipsoids correspond to Fe, N, O, and C atoms, respectively. Cyan, gray, and white spheres correspond to Si, C, and H atoms, respectively. Next-nearest structure around the donor atoms is given to assist in comparison of the principal axes of the ellipsoids with the overall molecular geometry.

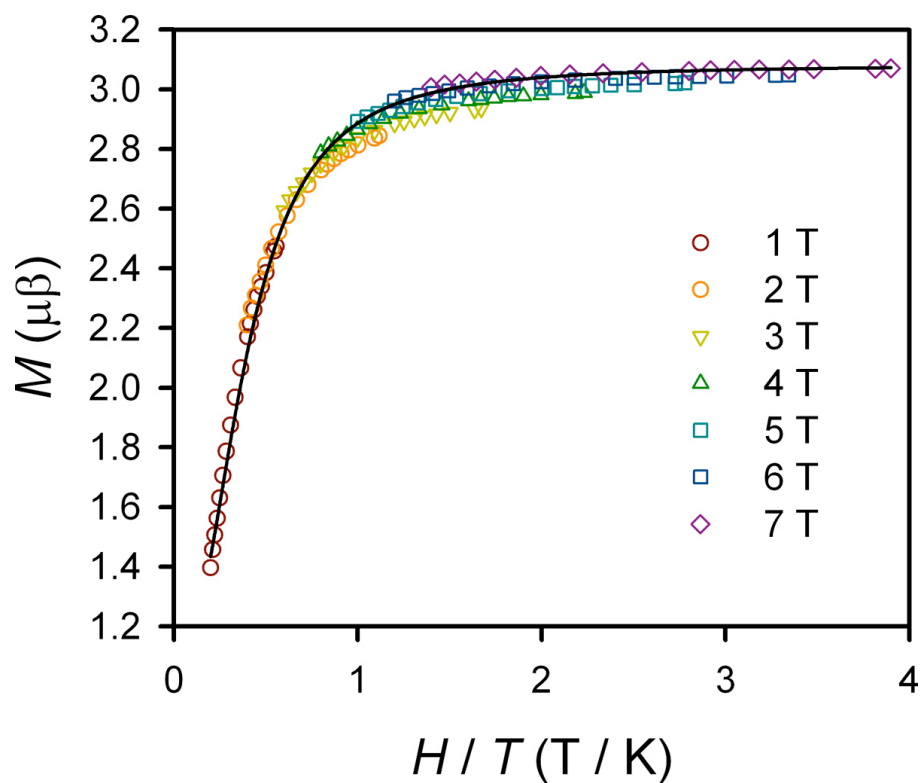

**Figure S2.** Variable field, variable temperature magnetization data collected on **1** from 1 to 7 T at temperatures from 1.8 to 5 K. The black line represents the master equation used to determine the superimposability index, as discussed in the main text and above.

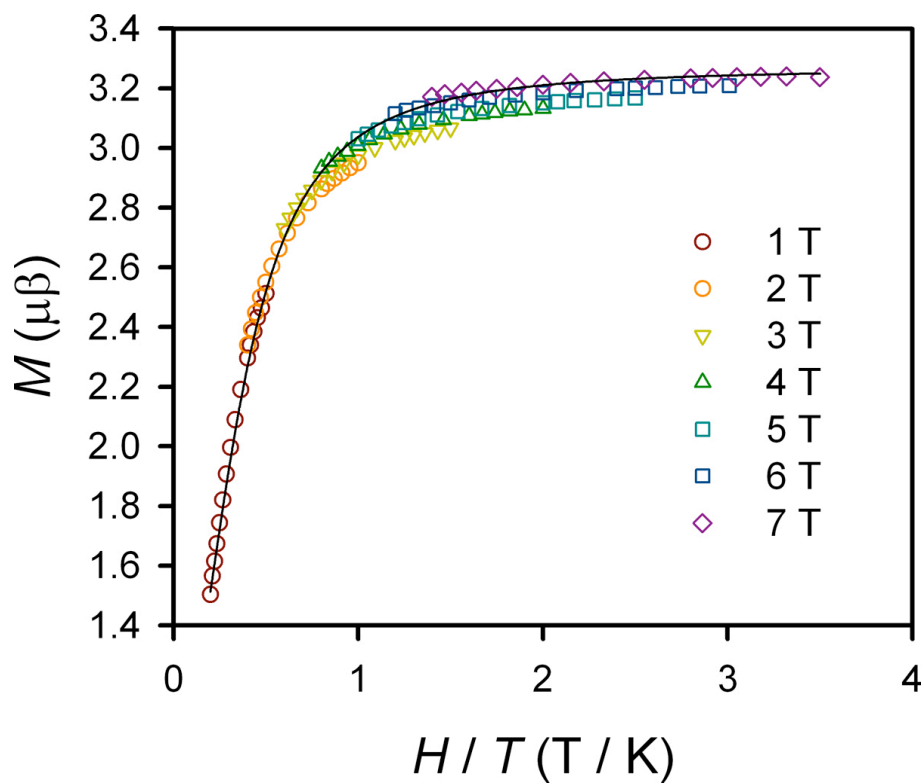

**Figure S3.** Variable field, variable temperature magnetization data collected on **2** from 1 to 7 T at temperatures from 1.8 to 5 K. The black line represents the master equation used to determine the superimposability index, as discussed in the main text and above.

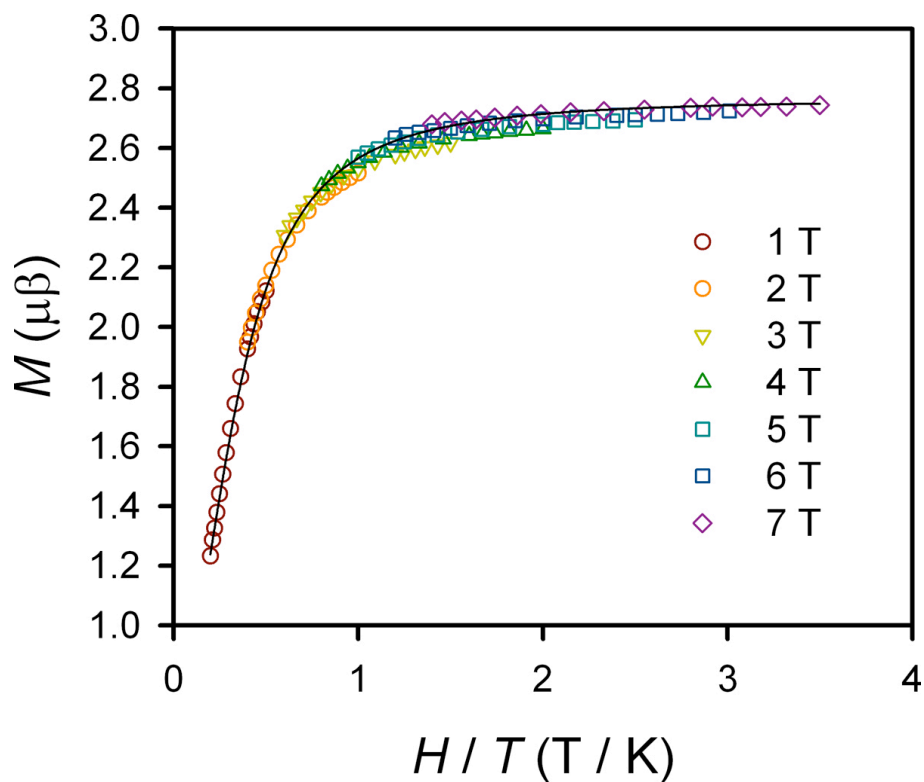

**Figure S4.** Variable field, variable temperature magnetization data collected on **3** from 1 to 7 T at temperatures from 1.8 to 5 K. The black line represents the master equation used to determine the superimposability index, as discussed in the main text and above.



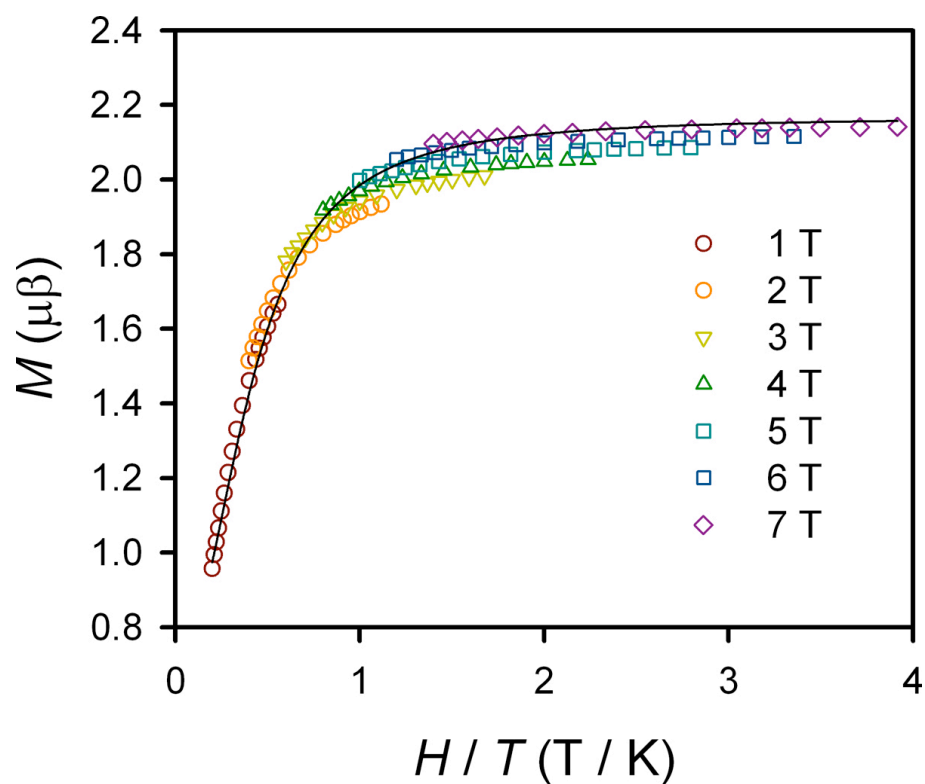

**Figure S5.** Variable field, variable temperature magnetization data collected on **4** from 1 to 7 T at temperatures from 1.8 to 5 K. The black line represents the master equation used to determine the superimposability index, as discussed in the main text and above.

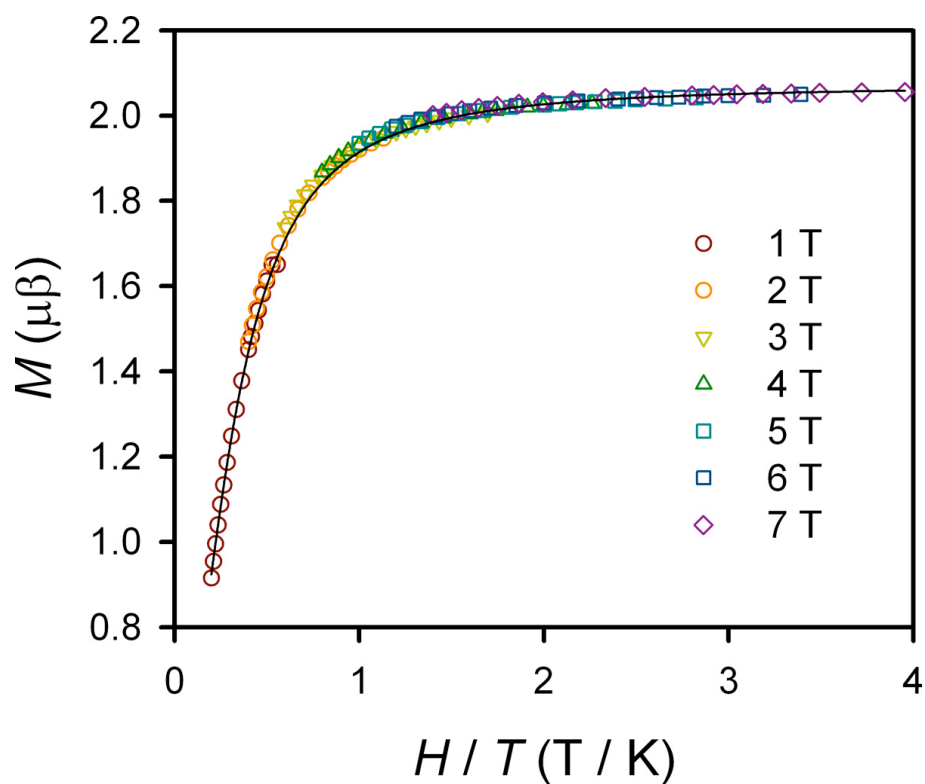

**Figure S6.** Variable field, variable temperature magnetization data collected on **5** from 1 to 7 T at temperatures from 1.8 to 5 K. The black line represents the master equation used to determine the superimposability index, as discussed in the main text and above.

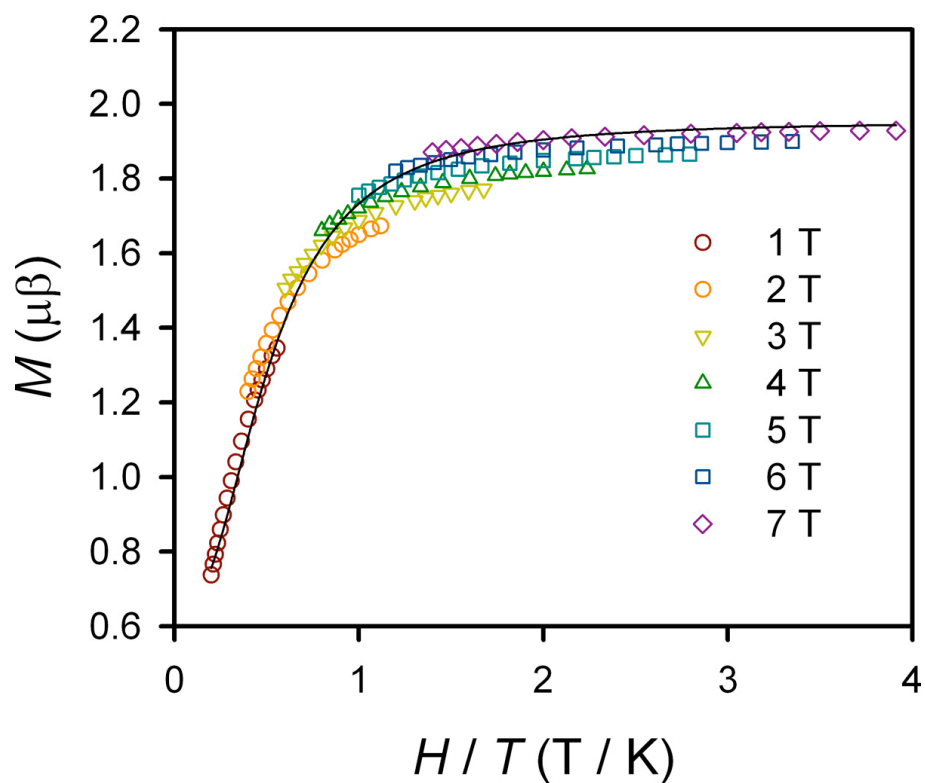

**Figure S7.** Variable field, variable temperature magnetization data collected on **6** from 1 to 7 T at temperatures from 1.8 to 5 K. The black line represents the master equation used to determine the superimposability index, as discussed in the main text and above.

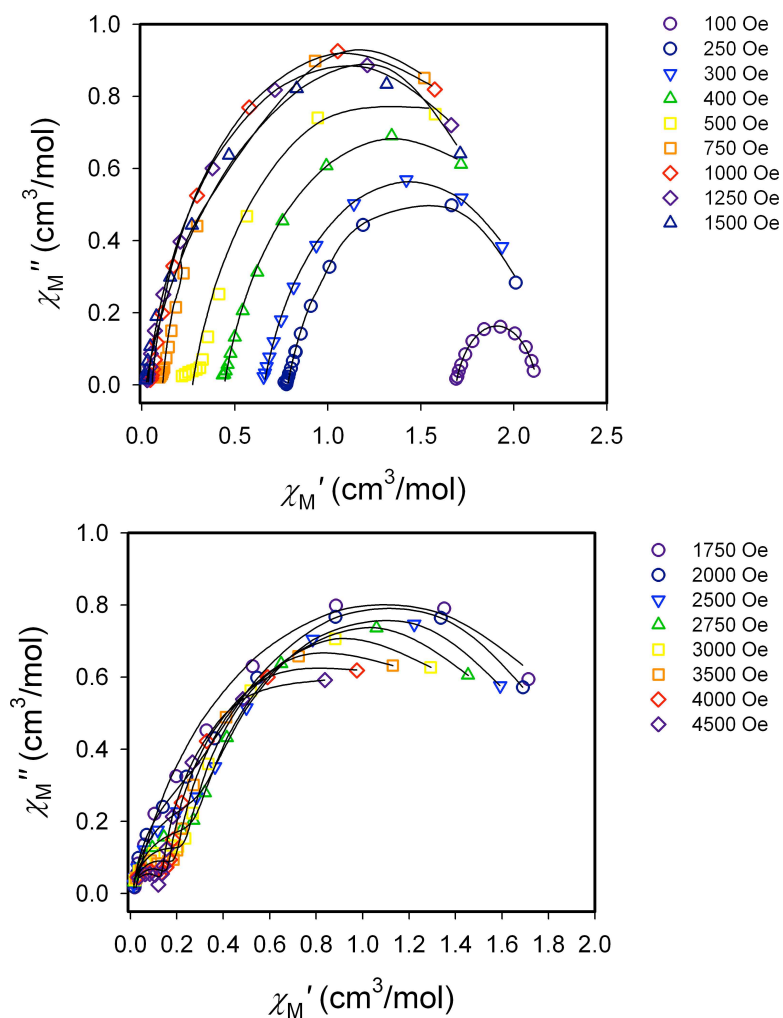

**Figure S8.** Cole-cole plots fit for the determination of the field dependence of  $\tau$  for **1** at 2 K. Black lines are the result of fits to a generalized Debye model as described in the main text.

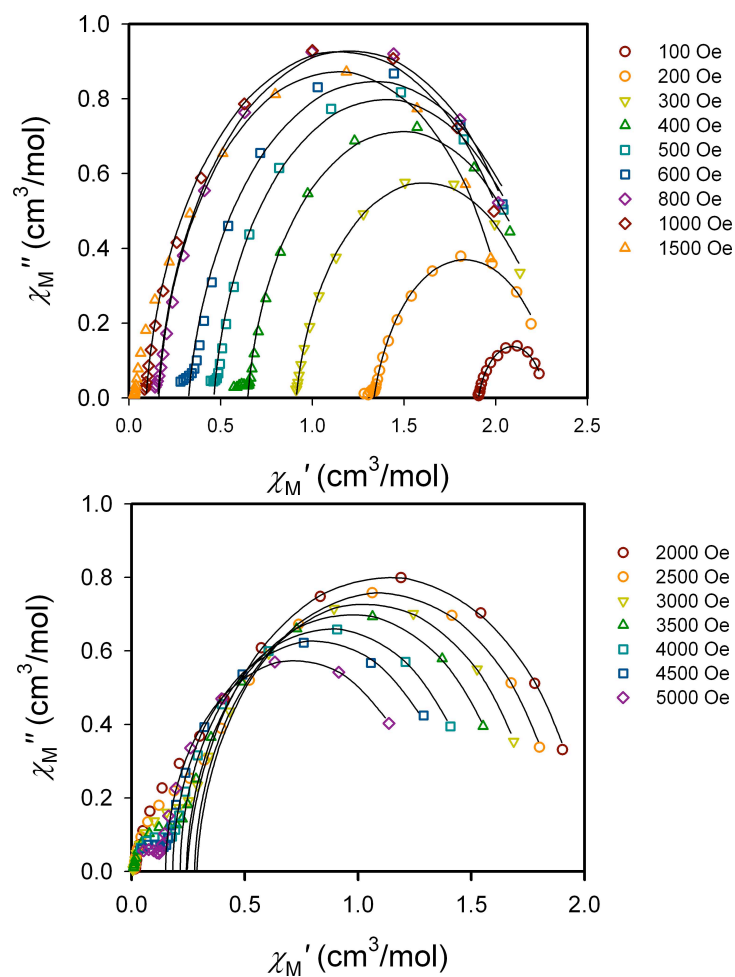

**Figure S9.** Cole-cole plots fit for the determination of the field dependence of  $\tau$  for **2** at 2 K. Black lines are the result of fits to a generalized Debye model as described in the main text.

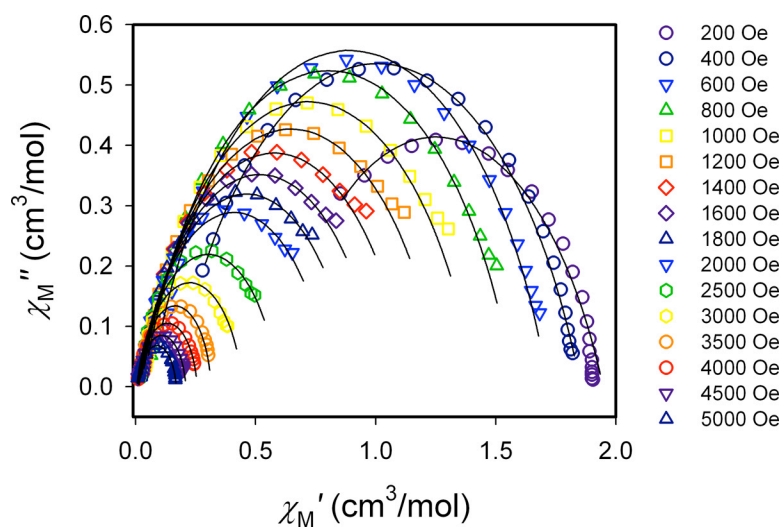

**Figure S10.** Cole-cole plots fit for the determination of the field dependence of  $\tau$  for **3** at 2 K. Black lines are the result of fits to a generalized Debye model as described in the main text.

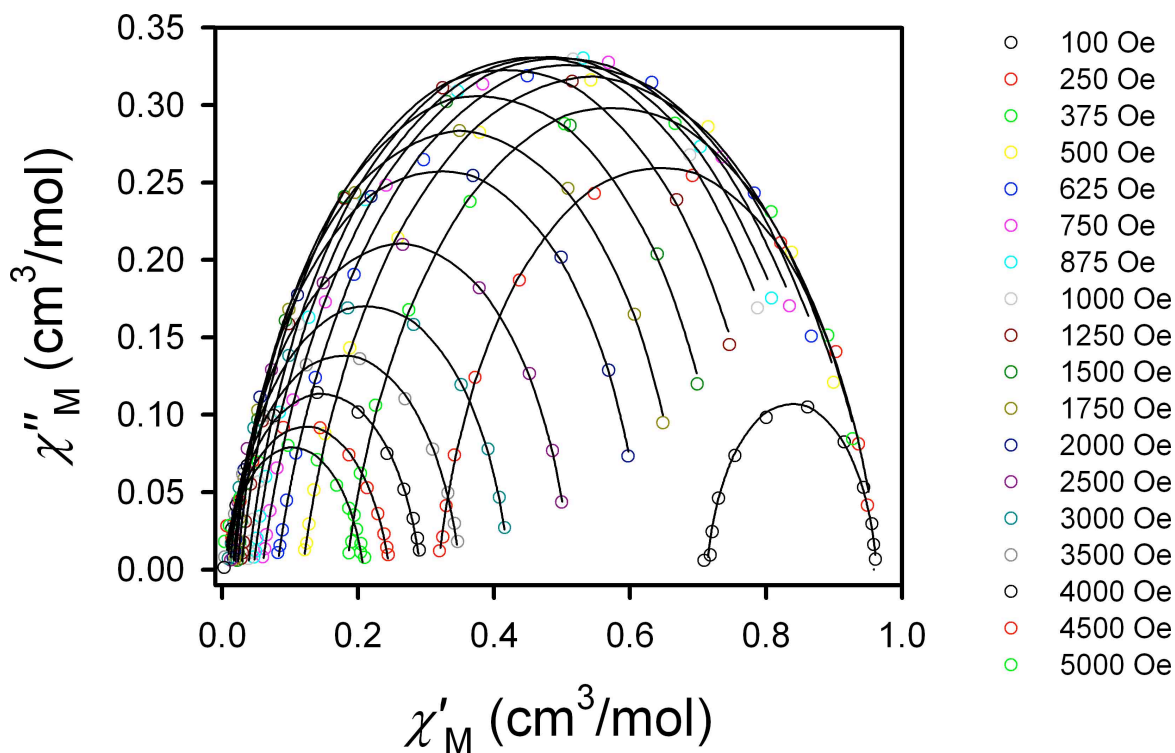

**Figure S11.** Cole-cole plots fit for the determination of the field dependence of  $\tau$  for **4** at 2 K. Black lines are the result of fits to a generalized Debye model as described in the main text.

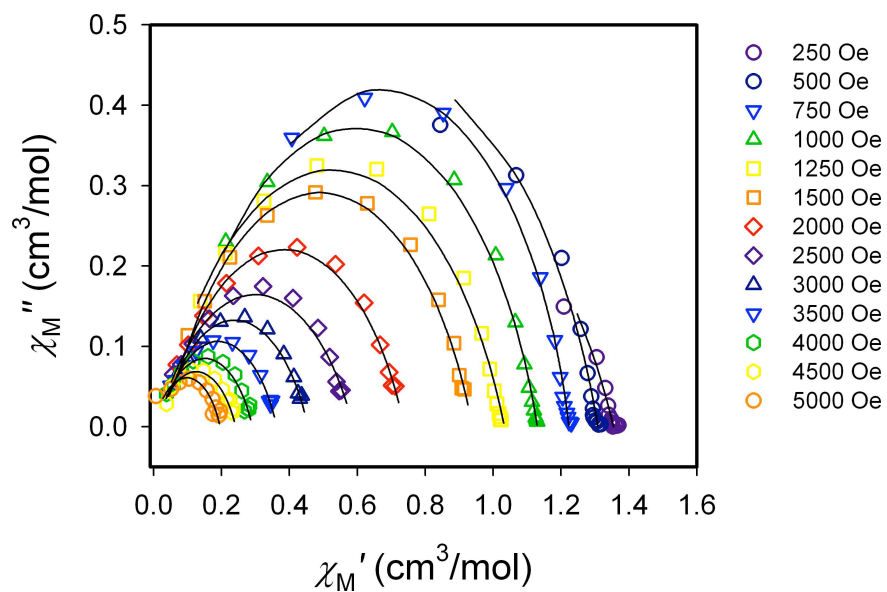

**Figure S12.** Cole-cole plots fit for the determination of the field dependence of  $\tau$  for **5** at 2 K. Black lines are the result of fits to a generalized Debye model as described in the main text.



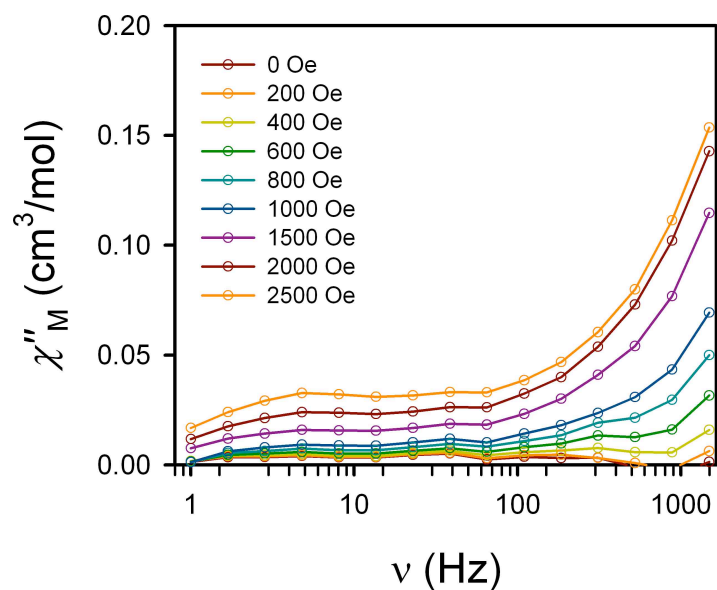

**Figure S13.** Frequency dependence of the out-of-phase susceptibility of **6** as a function of applied field at 2K. Solid lines are a guide for the eye.

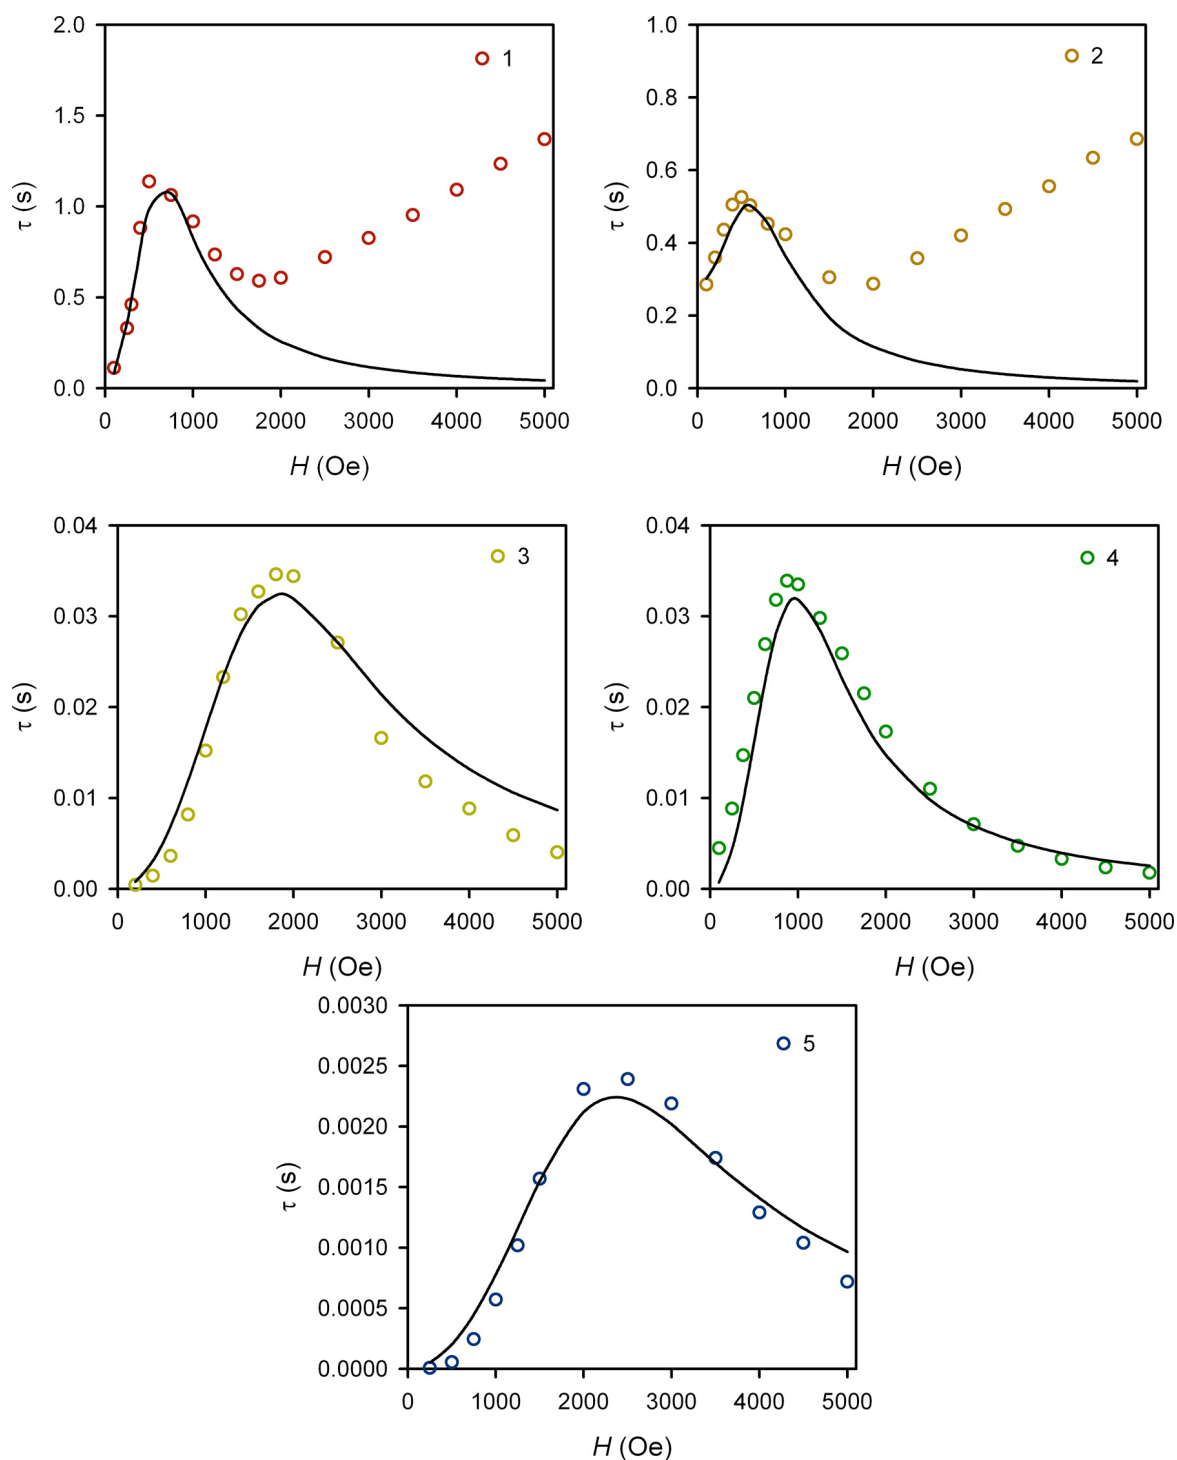

**Figure S14.** Field dependence of  $\tau$  for **1-5** at 2 K. Black lines represent fits as discussed in the main body of the report.

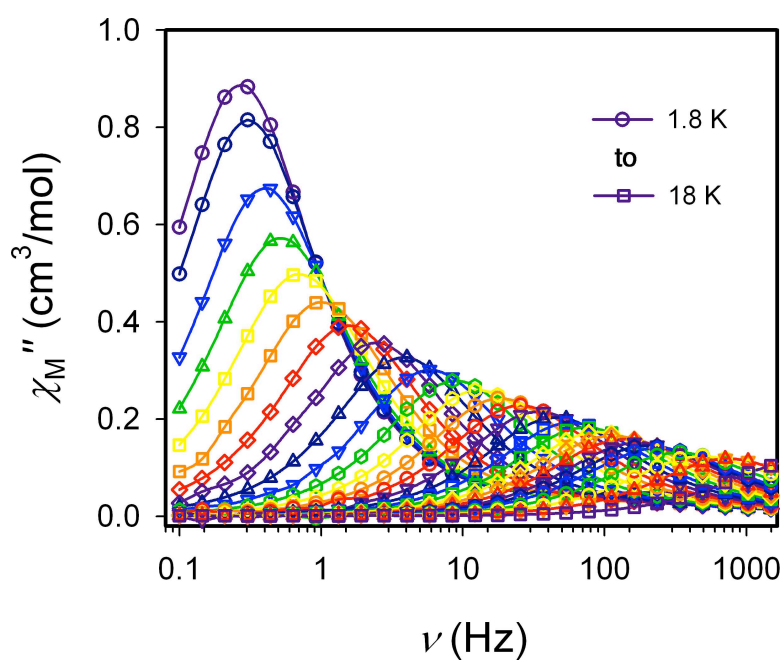

**Figure S15.** Frequency dependence of the out-of-phase susceptibility of **2** as a function of temperature. Data were collected under an applied dc field of 500 Oe.

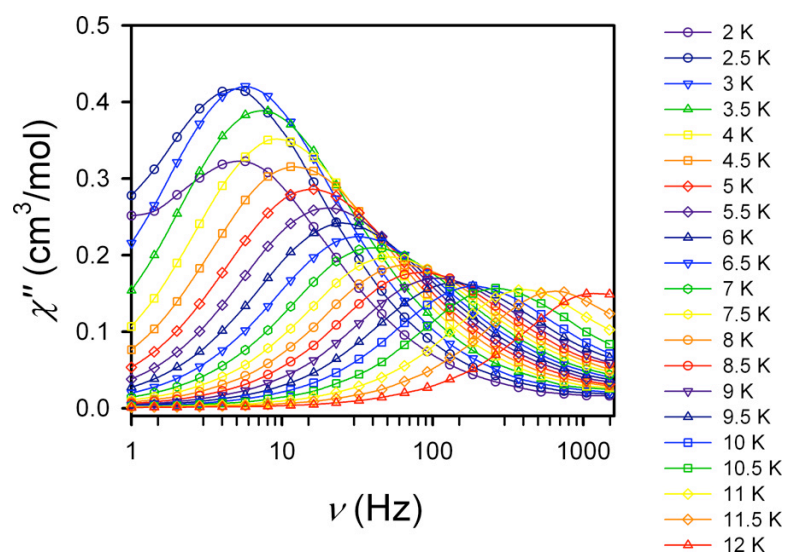

**Figure S16.** Frequency dependence of the out-of-phase susceptibility of **3** as a function of temperature. Data were collected under an applied dc field of 875 Oe.

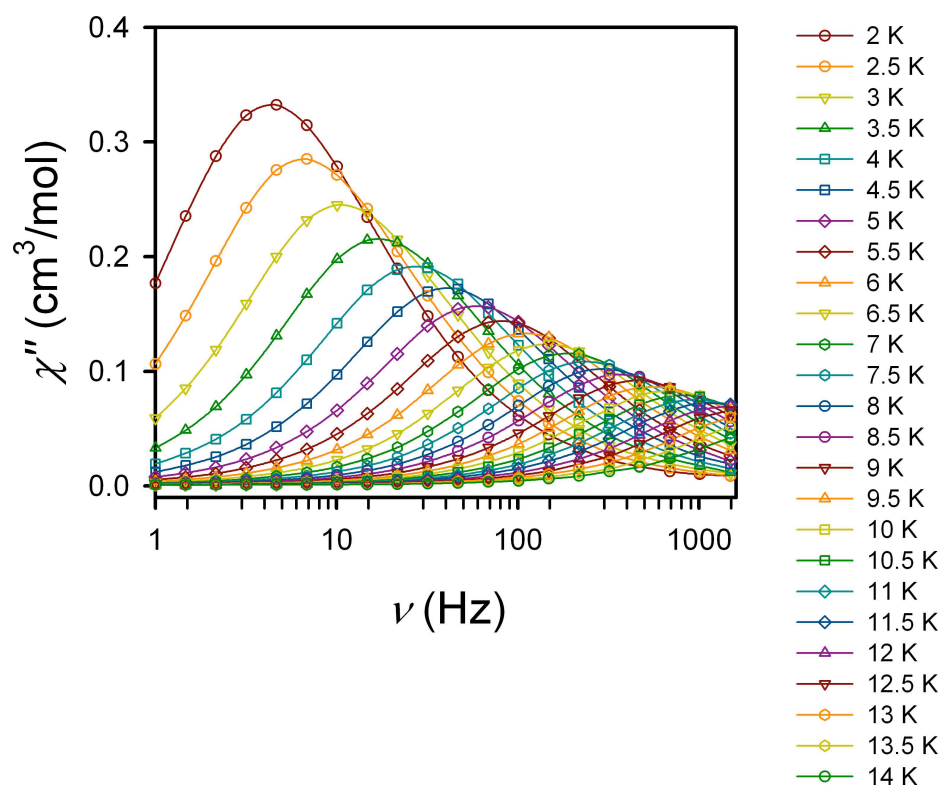

**Figure S17.** Frequency dependence of the out-of-phase susceptibility of **4** as a function of temperature. Data were collected under an applied dc field of 875 Oe.

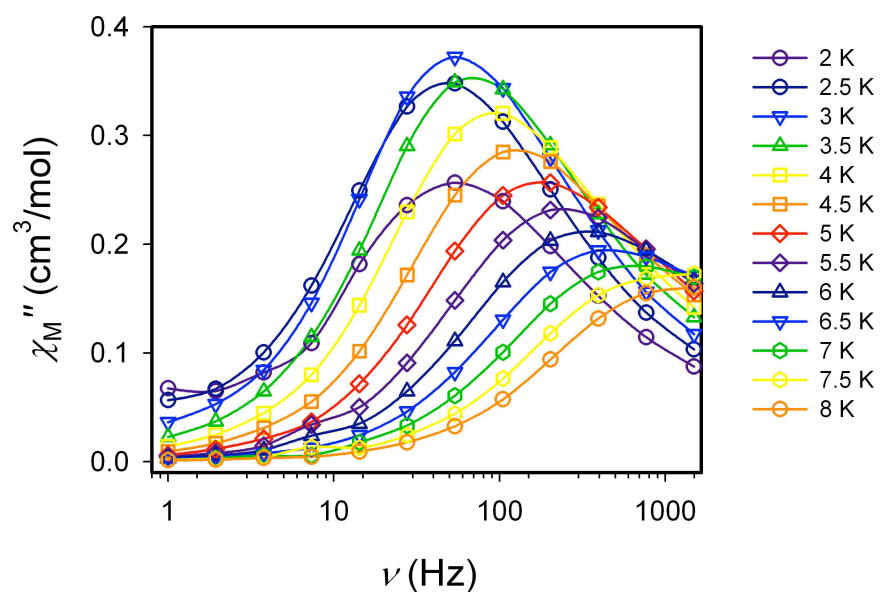

**Figure S18.** Frequency dependence of the out-of-phase susceptibility of **5** as a function of temperature. Data were collected under an applied dc field of 2500 Oe.

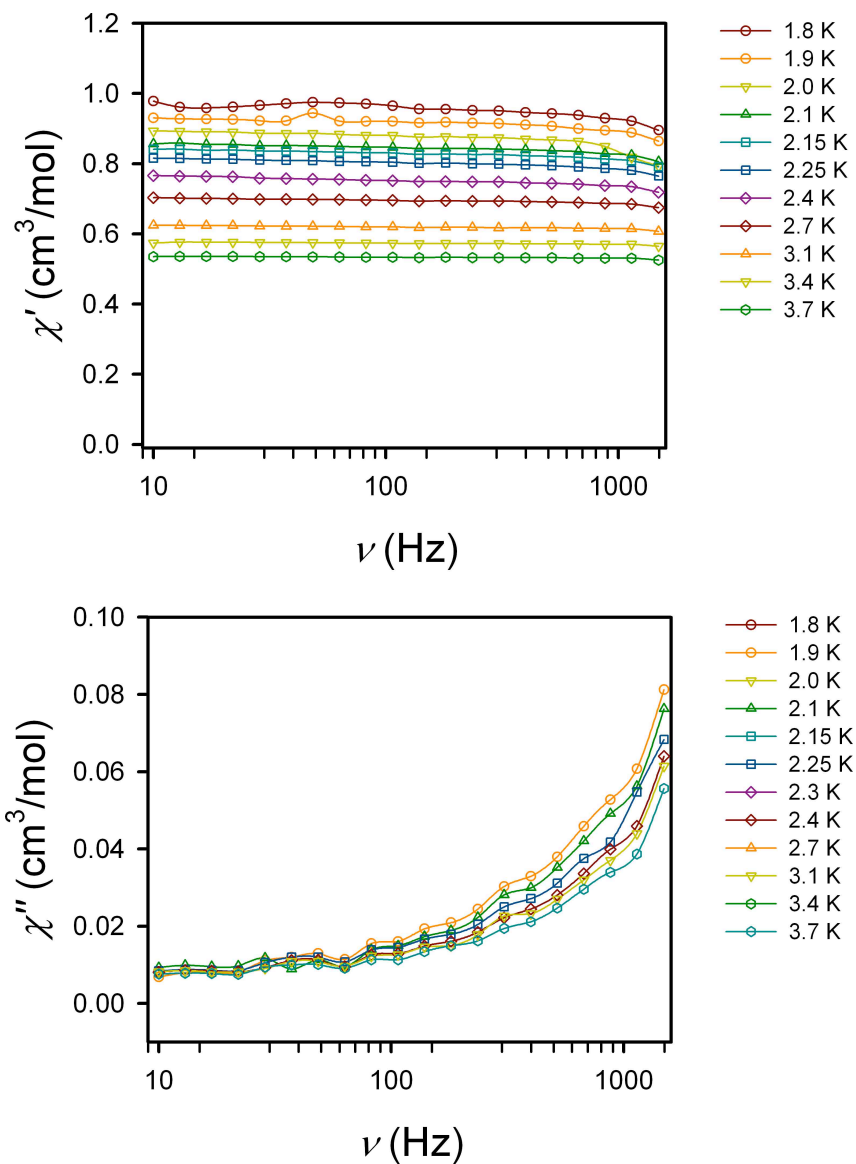

**Figure S19.** Frequency dependence of the in-phase (top) and out-of-phase (bottom) susceptibilities of **6** as a function of temperature. Data were collected under an applied dc field of 1000 Oe.

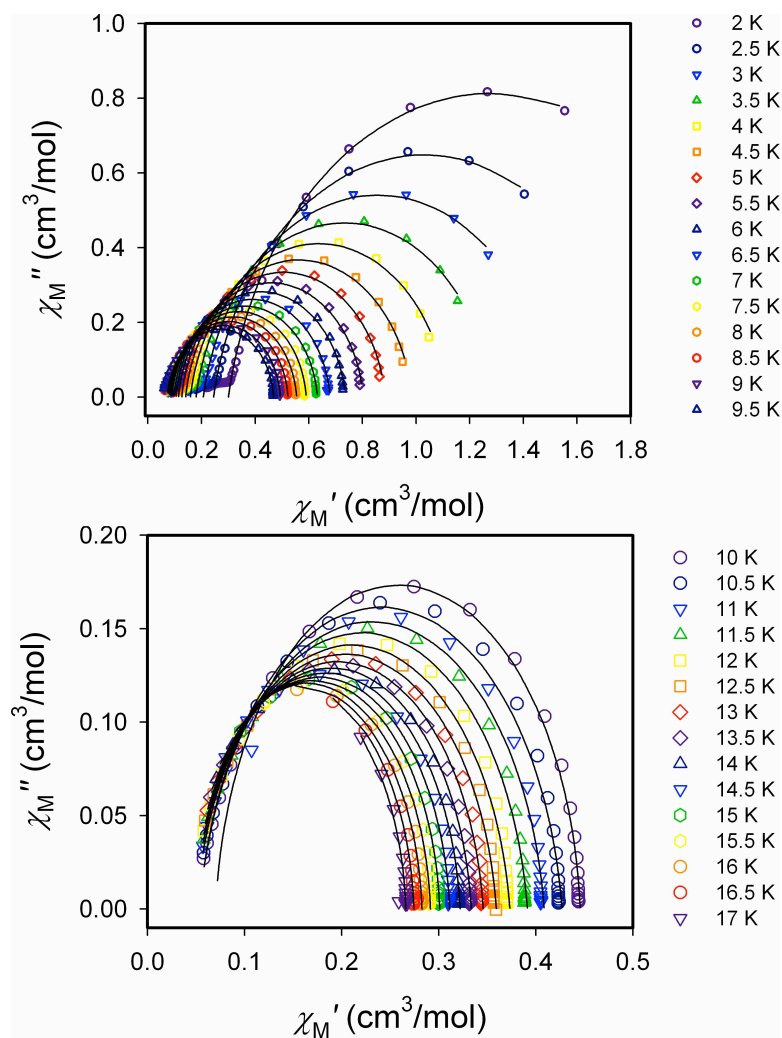

**Figure S20.** Cole-cole plots of the frequency dependence of  $\chi_M'$  and  $\chi_M''$  used to evaluate the temperature dependence of  $\tau$  for **1**. Top: data collected from 2 to 9.5 K. Bottom: data collected from 10 to 17 K. Black lines are fits to the general Debye model as described in the main text.



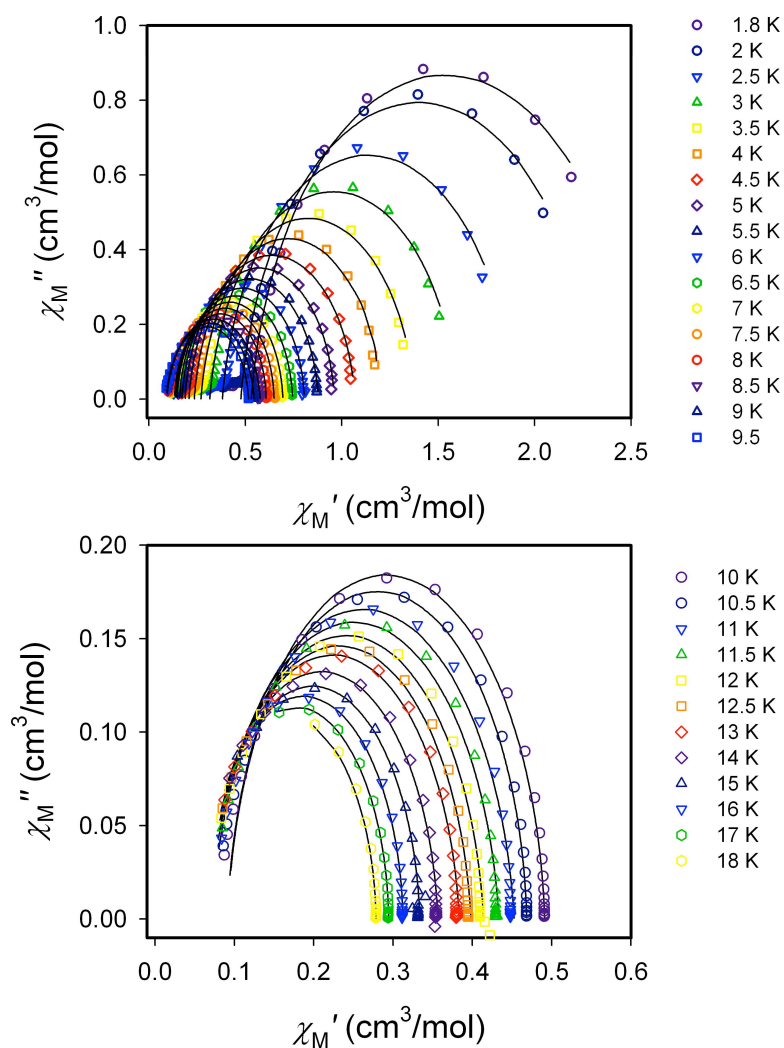

**Figure S21.** Cole-cole plots of the frequency dependence of  $\chi_M'$  and  $\chi_M''$  used to evaluate the temperature dependence of  $\tau$  for **2**. Black lines are fits to the general Debye model as described in the main text.

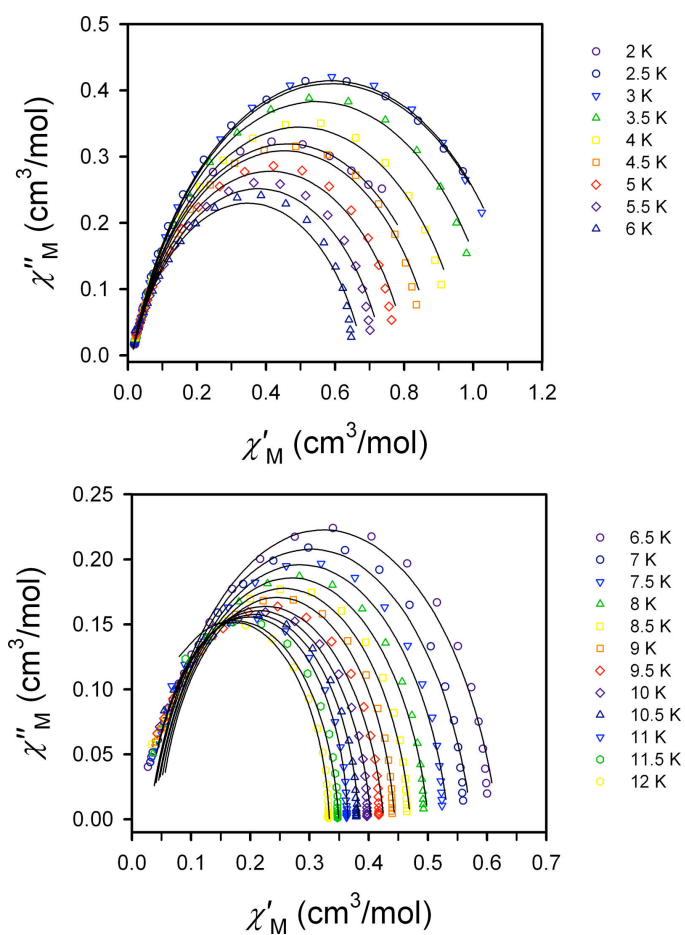

**Figure S22.** Cole-cole plots of the frequency dependence of  $\chi'_M$  and  $\chi''_M$  used to evaluate the temperature dependence of  $\tau$  for **3**. Black lines are fits to the general debye model as described in the main text.

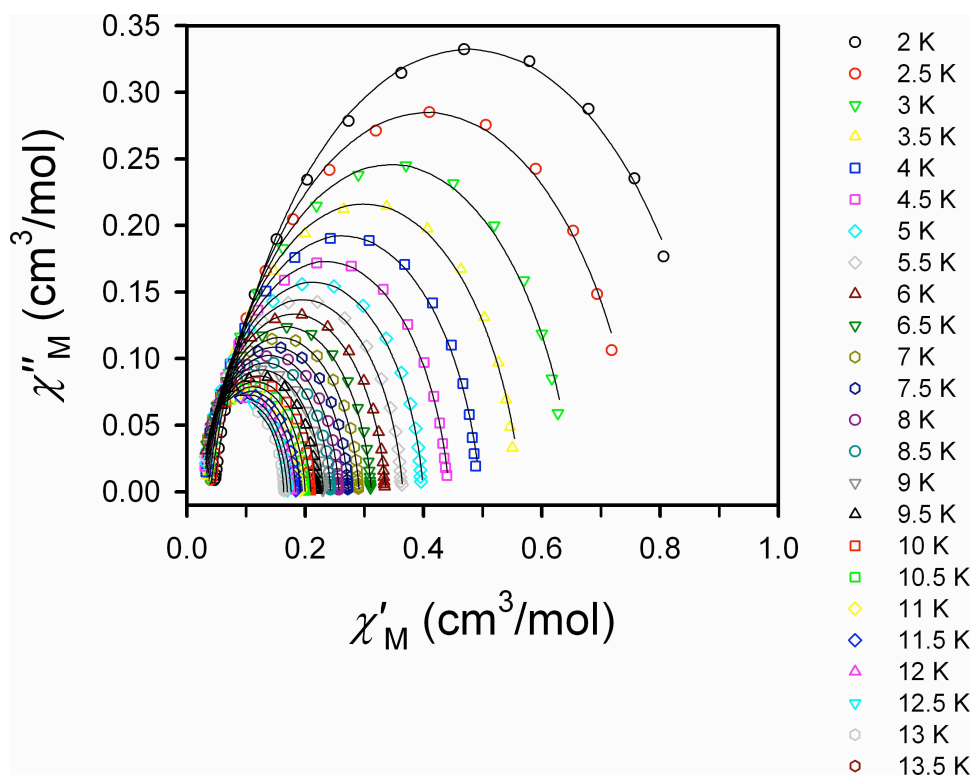

**Figure S23.** Cole-cole plots of the frequency dependence of  $\chi'_M$  and  $\chi''_M$  used to evaluate the temperature dependence of  $\tau$  for 4. Black lines are fits to the general debye model as described in the main text.

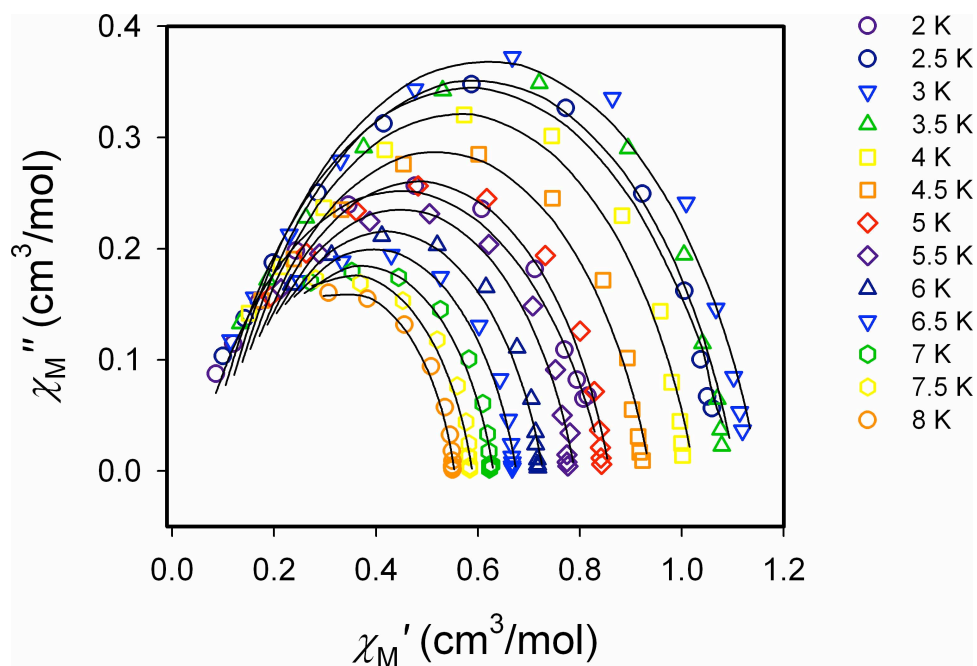

**Figure S24.** Cole-cole plots of the frequency dependence of  $\chi_M'$  and  $\chi_M''$  used to evaluate the temperature dependence of  $\tau$  for **5**. Black lines are fits to the general debye model as described in the main text.
